# Supplementary material for: Continued Use of a Single Antiplatelet Agent Does Not Increase the Risk of Delayed Bleeding After Colorectal Endoscopic Submucosal Dissection
Source: Springer Nature journal article supplement (doi:10.1007/s10620-017-4843-0), 2017-11-24
Supplement: MOESM1 [file 15251772]

## STROBE

STROBE Statement—Checklist of items that should be included in reports of *cohort studies*

| <b>Item</b>               |           |                                                                                                                                   |
|---------------------------|-----------|-----------------------------------------------------------------------------------------------------------------------------------|
|                           | <b>No</b> | <b>Recommendation</b>                                                                                                             |
| <b>Title and abstract</b> | 1         | (a) Indicate the study's design with a commonly used term in the title or the abstract 1-2                                        |
|                           |           | (b) Provide in the abstract an informative and balanced summary of what was done and what was found 2                             |
| <b>Introduction</b>       |           |                                                                                                                                   |
| Background/rationale      | 2         | Explain the scientific background and rationale for the investigation being reported 3                                            |
| Objectives                | 3         | State specific objectives, including any prespecified hypotheses 3-4                                                              |
| <b>Methods</b>            |           |                                                                                                                                   |
| Study design              | 4         | Present key elements of study design early in the paper 4                                                                         |
| Setting                   | 5         | Describe the setting, locations, and relevant dates, including periods of recruitment, exposure, follow-up, and data collection 4 |
| Participants              | 6         | (a) Give the eligibility criteria, and the sources and methods of selection of participants. Describe methods of follow-up 4-5    |
|                           |           | (b) For matched studies, give matching criteria and number                                                                        |

|                              |     |                                                                                                                                                                                                                                                                                                                                                            |
|------------------------------|-----|------------------------------------------------------------------------------------------------------------------------------------------------------------------------------------------------------------------------------------------------------------------------------------------------------------------------------------------------------------|
|                              |     | of exposed and unexposed 4                                                                                                                                                                                                                                                                                                                                 |
| Variables                    | 7   | Clearly define all outcomes, exposures, predictors, potential confounders, and effect modifiers. Give diagnostic criteria, if applicable 6-7                                                                                                                                                                                                               |
| Data sources/<br>measurement | 8*  | For each variable of interest, give sources of data and details of methods of assessment (measurement). Describe comparability of assessment methods if there is more than one group 6-7                                                                                                                                                                   |
| Bias                         | 9   | Describe any efforts to address potential sources of bias N/A                                                                                                                                                                                                                                                                                              |
| Study size                   | 10  | Explain how the study size was arrived at 4                                                                                                                                                                                                                                                                                                                |
| Quantitative variables       | 11  | Explain how quantitative variables were handled in the analyses. If applicable, describe which groupings were chosen and why 6-7                                                                                                                                                                                                                           |
| Statistical methods          | 12  | (a) Describe all statistical methods, including those used to control for confounding 7-8<br><br>(b) Describe any methods used to examine subgroups and interactions N/A<br><br>(c) Explain how missing data were addressed N/A<br><br>(d) If applicable, explain how loss to follow-up was addressed N/A<br><br>(e) Describe any sensitivity analyses N/A |
| <b>Results</b>               |     |                                                                                                                                                                                                                                                                                                                                                            |
| Participants                 | 13* | (a) Report numbers of individuals at each stage of study—eg numbers potentially eligible, examined for eligibility,                                                                                                                                                                                                                                        |

|                   |     |                                                                                                                                                                                                                   |
|-------------------|-----|-------------------------------------------------------------------------------------------------------------------------------------------------------------------------------------------------------------------|
|                   |     | confirmed eligible, included in the study, completing follow-up, and analysed 8                                                                                                                                   |
|                   |     | (b) Give reasons for non-participation at each stage 8 (Fig1)                                                                                                                                                     |
|                   |     | (c) Consider use of a flow diagram 8                                                                                                                                                                              |
| Descriptive data  | 14* | (a) Give characteristics of study participants (eg demographic, clinical, social) and information on exposures and potential confounders 8-9                                                                      |
|                   |     | (b) Indicate number of participants with missing data for each variable of interest 8-9                                                                                                                           |
|                   |     | (c) Summarise follow-up time (eg, average and total amount) N/A                                                                                                                                                   |
| Outcome data      | 15* | Report numbers of outcome events or summary measures over time 9-10                                                                                                                                               |
| Main results      | 16  | (a) Give unadjusted estimates and, if applicable, confounder-adjusted estimates and their precision (eg, 95% confidence interval). Make clear which confounders were adjusted for and why they were included 9-10 |
|                   |     | (b) Report category boundaries when continuous variables were categorized N/A                                                                                                                                     |
|                   |     | (c) If relevant, consider translating estimates of relative risk into absolute risk for a meaningful time period N/A                                                                                              |
| Other analyses    | 17  | Report other analyses done—eg analyses of subgroups and interactions, and sensitivity analyses 10                                                                                                                 |
| <b>Discussion</b> |     |                                                                                                                                                                                                                   |

|                          |    |                                                                                                                                                                                  |
|--------------------------|----|----------------------------------------------------------------------------------------------------------------------------------------------------------------------------------|
| Key results              | 18 | Summarise key results with reference to study objectives 10-11                                                                                                                   |
| Limitations              | 19 | Discuss limitations of the study, taking into account sources of potential bias or imprecision. Discuss both direction and magnitude of any potential bias 14                    |
| Interpretation           | 20 | Give a cautious overall interpretation of results considering objectives, limitations, multiplicity of analyses, results from similar studies, and other relevant evidence 11-14 |
| Generalisability         | 21 | Discuss the generalisability (external validity) of the study results 11-12                                                                                                      |
| <b>Other information</b> |    |                                                                                                                                                                                  |
| Funding                  | 22 | Give the source of funding and the role of the funders for the present study and, if applicable, for the original study on which the present article is based N/A                |
